# Supplementary material for: Plasma Lipidome and Prediction of Type 2 Diabetes in the Population-Based Malmö Diet and Cancer Cohort
Source: Oxford University Press journal article supplement (doi:10.2337/dc19-1199), 2019-12-08

SUPPLEMENTARY DATA

**Supplementary Figure 1. Incidence of type 2 diabetes mellitus in relation to baseline levels of lipid species in the discovery set (n=1868) (1A) and the replication set (n=1800) (1B).** Hazard ratios (HR) are expressed as 10 log HRs per SD unit increase of lipid. Error bars denote 95% SD of 10 log HR. The regressions are adjusted for age and sex. Abbreviations: CE, cholesteryl ester; DAG, diacylglyceride; LPC, lysophosphatidylcholine; LPE, lysophosphatidylethanolamine; PC, phosphatidylcholine; PC O, PC plasmalogen; PE O, phosphatidylethanolamine plasmalogen; SM, sphingomyeline; TAG, triacylglyceride.

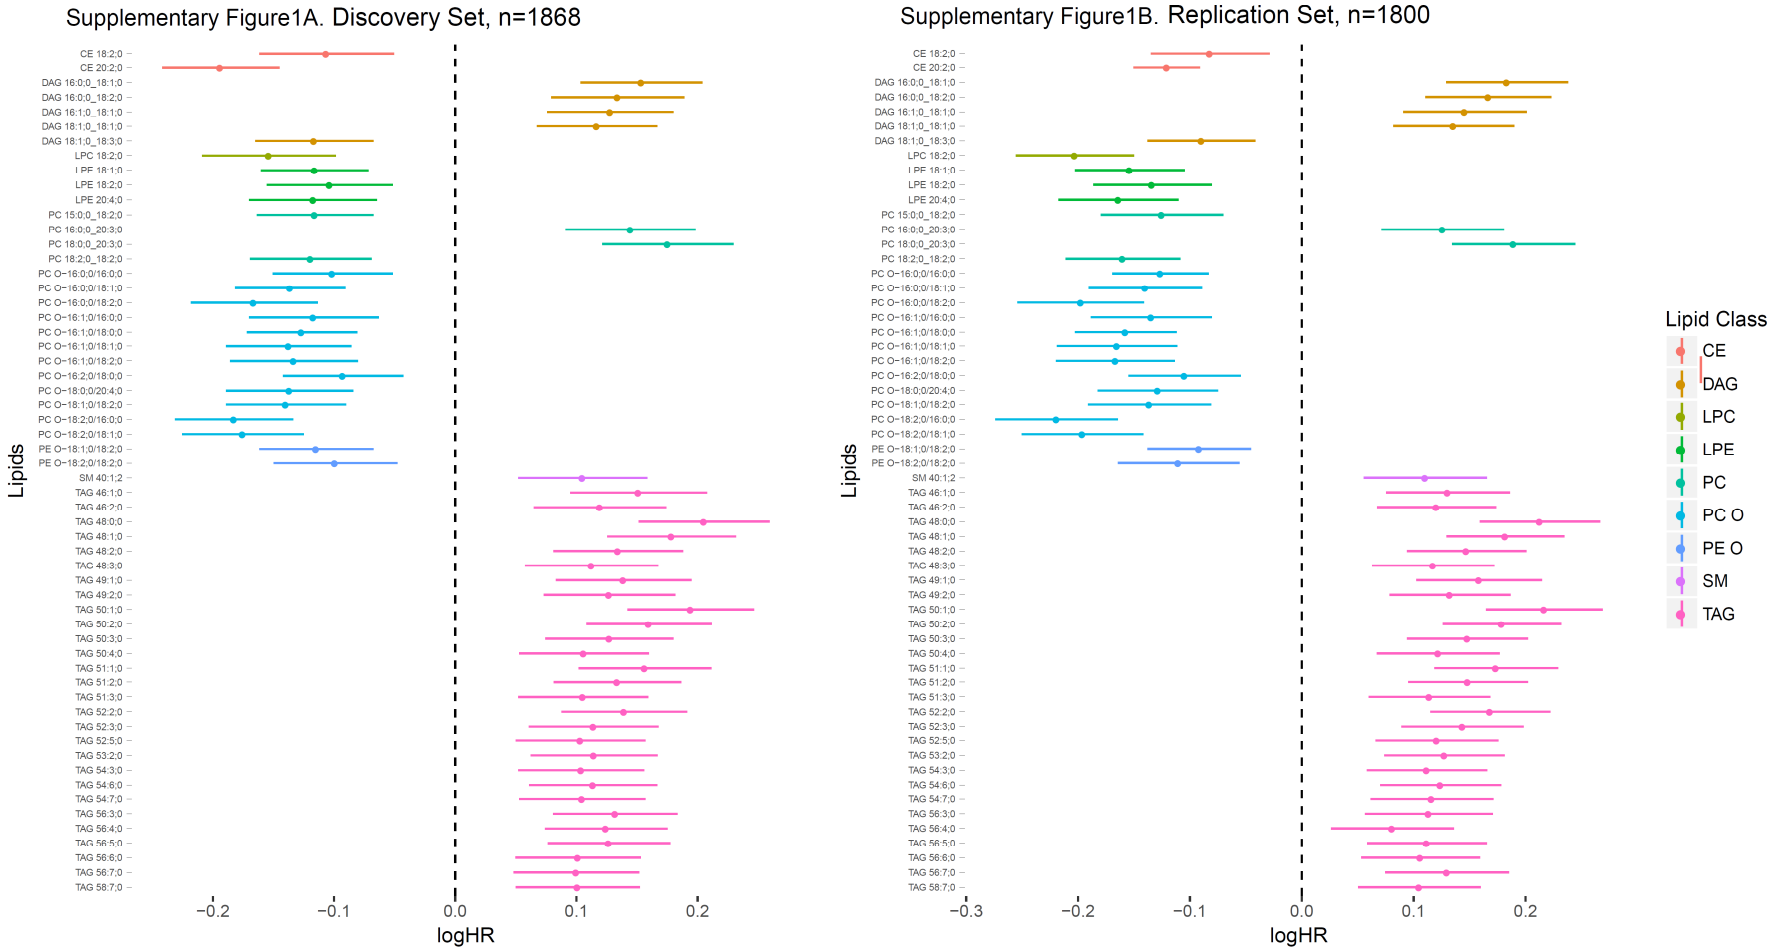

**Supplementary Figure 2. OPLS-DA to analyze correlations between 178 lipid species and T2DM incidence in the discovery set (n=1868) (1A) and in the entire cohort (n=3668) (1B).** The model parameters are R2Y=0.12, Q2Y=0.08. Each green dot represents an individual that remains free from diabetes during follow-up time, while each blue dot represents an individual that develops diabetes during follow-up.

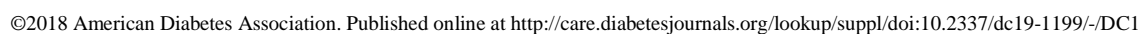

# SUPPLEMENTARY DATA

**Supplementary Figure 3. Cumulative incidence rate of T2DM events according to quintiles of lipid-PC<sub>DM</sub> in the replication set (n=1800).**

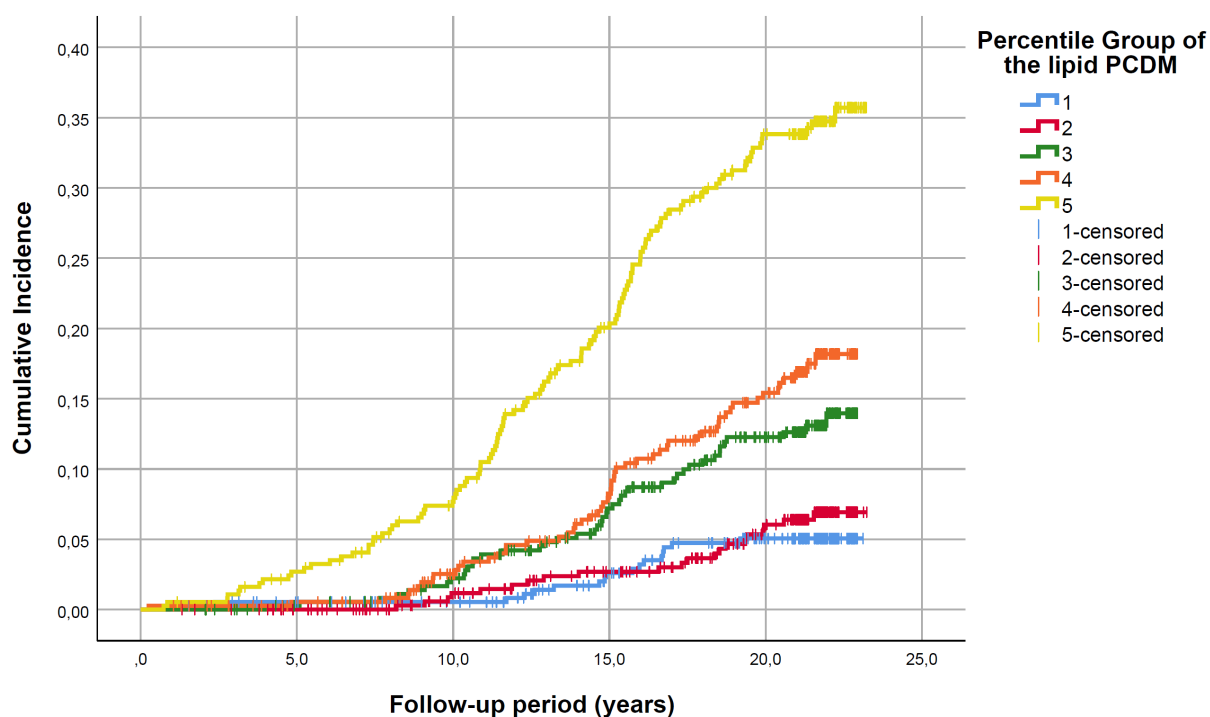

Supplement: dc191199supplementarydata1.pdf [file dc191199supplementarydata1.pdf]
