# Supplementary material for: Plasma Lipidome and Prediction of Type 2 Diabetes in the Population-Based Malmö Diet and Cancer Cohort
Source: Oxford University Press journal article supplement (doi:10.2337/dc19-1199), 2019-12-08
Supplement: dc191199supplementarydata2.xlsx [file dc191199supplementarydata2.xlsx]

## Sheet: Supp_Table1
Supplemental Table 1: List of measured lipids
Lipid	SwissLipids Name	SwissLipids ID
CE 14:0;0	Sterol ester (27:1/14:0)	SLM:000500342
CE 15:0;0	Sterol ester (27:1/15:0)	SLM:000500343
CE 16:0;0	Sterol ester (27:1/16:0)	SLM:000500346
CE 16:1;0	Sterol ester (27:1/16:1)	SLM:000500345
CE 17:0;0	Sterol ester (27:1/17:0)	SLM:000500347
CE 17:1;0	NA	NA
CE 18:0;0	Sterol ester (27:1/18:0)	SLM:000500352
CE 18:1;0	Sterol ester (27:1/18:1)	SLM:000500351
CE 18:2;0	Sterol ester (27:1/18:2)	SLM:000500350
CE 18:3;0	Sterol ester (27:1/18:3)	SLM:000500349
CE 20:2;0	Sterol ester (27:1/20:2)	SLM:000500357
CE 20:3;0	Sterol ester (27:1/20:3)	SLM:000500356
CE 20:4;0	Sterol ester (27:1/20:4)	SLM:000500355
CE 20:5;0	Sterol ester (27:1/20:5)	SLM:000500354
CE 22:6;0	Sterol ester (27:1/22:6)	SLM:000500361
Cer 40:1;2	Ceramide (d40:1)	SLM:000391319
Cer 40:2;2	Ceramide (d40:2)	SLM:000391317
Cer 42:1;2	Ceramide (d42:1)	SLM:000391346
Cer 42:2;2	Ceramide (d42:2)	SLM:000391345
Chol	cholesterol	SLM:000000287
DAG 16:0;0_18:1;0	Diacylglycerol (16:0_18:1)	SLM:000308862
DAG 16:0;0_18:2;0	Diacylglycerol (16:0_18:2)	SLM:000308863
DAG 16:1;0_18:1;0	Diacylglycerol (16:1_18:1)	SLM:000308894
DAG 18:1;0_18:1;0	Diacylglycerol (18:1_18:1)	SLM:000309012
DAG 18:1;0_18:2;0	Diacylglycerol (18:1_18:2)	SLM:000309013
DAG 18:1;0_18:3;0	Diacylglycerol (18:1_18:3)	SLM:000309014
LPC 14:0;0	Phosphatidylcholine (14:0_0:0)	SLM:000063555
LPC 16:0;0	Phosphatidylcholine (16:0_0:0)	SLM:000063723
LPC 16:1;0	Phosphatidylcholine (16:1_0:0)	SLM:000063777
LPC 18:0;0	Phosphatidylcholine (18:0_0:0)	SLM:000063933
LPC 18:1;0	Phosphatidylcholine (18:1_0:0)	SLM:000063983
LPC 18:2;0	Phosphatidylcholine (18:2_0:0)	SLM:000064032
LPC 20:3;0	Phosphatidylcholine (20:3_0:0)	SLM:000064347
LPC 20:4;0	Phosphatidylcholine (20:4_0:0)	SLM:000064388
LPC 22:6;0	Phosphatidylcholine (22:6_0:0)	SLM:000064712
LPE 16:0;0	Phosphatidylethanolamine (16:0_0:0)	SLM:000067687
LPE 18:0;0	Phosphatidylethanolamine (18:0_0:0)	SLM:000067897
LPE 18:1;0	Phosphatidylethanolamine (18:1_0:0)	SLM:000067947
LPE 18:2;0	Phosphatidylethanolamine (18:2_0:0)	SLM:000067996
LPE 20:4;0	Phosphatidylethanolamine (20:4_0:0)	SLM:000068352
PC 14:0;0_18:1;0	Phosphatidylcholine (14:0_18:1)	SLM:000063564
PC 14:0;0_18:2;0	Phosphatidylcholine (14:0_18:2)	SLM:000063565
PC 15:0;0_18:1;0	Phosphatidylcholine (15:0_18:1)	SLM:000063675
PC 15:0;0_18:2;0	Phosphatidylcholine (15:0_18:2)	SLM:000063676
PC 16:0;0_16:0;0	Phosphatidylcholine (16:0_16:0)	SLM:000063724
PC 16:0;0_16:1;0	Phosphatidylcholine (16:0_16:1)	SLM:000063725
PC 16:0;0_17:1;0	NA	NA
PC 16:0;0_18:0;0	Phosphatidylcholine (16:0_18:0)	SLM:000063728
PC 16:0;0_18:1;0	Phosphatidylcholine (16:0_18:1)	SLM:000063729
PC 16:0;0_18:2;0	Phosphatidylcholine (16:0_18:2)	SLM:000063730
PC 16:0;0_18:3;0	Phosphatidylcholine (16:0_18:3)	SLM:000063731
PC 16:0;0_20:1;0	Phosphatidylcholine (16:0_20:1)	SLM:000063735
PC 16:0;0_20:2;0	Phosphatidylcholine (16:0_20:2)	SLM:000063736
PC 16:0;0_20:3;0	Phosphatidylcholine (16:0_20:3)	SLM:000063737
PC 16:0;0_20:4;0	Phosphatidylcholine (16:0_20:4)	SLM:000063738
PC 16:0;0_20:5;0	Phosphatidylcholine (16:0_20:5)	SLM:000063739
PC 16:0;0_22:4;0	Phosphatidylcholine (16:0_22:4)	SLM:000063745
PC 16:0;0_22:5;0	Phosphatidylcholine (16:0_22:5)	SLM:000063746
PC 16:0;0_22:6;0	Phosphatidylcholine (16:0_22:6)	SLM:000063747
PC 16:1;0_18:0;0	Phosphatidylcholine (16:1_18:0)	SLM:000063781
PC 16:1;0_18:1;0	Phosphatidylcholine (16:1_18:1)	SLM:000063782
PC 16:1;0_18:2;0	Phosphatidylcholine (16:1_18:2)	SLM:000063783
PC 17:0;0_18:2;0	Phosphatidylcholine (17:0_18:2)	SLM:000063886
PC 17:0;0_20:3;0	Phosphatidylcholine (17:0_20:3)	SLM:000063893
PC 17:0;0_20:4;0	Phosphatidylcholine (17:0_20:4)	SLM:000063894
PC 18:0;0_18:1;0	Phosphatidylcholine (18:0_18:1)	SLM:000063935
PC 18:0;0_18:2;0	Phosphatidylcholine (18:0_18:2)	SLM:000063936
PC 18:0;0_18:3;0	Phosphatidylcholine (18:0_18:3)	SLM:000063937
PC 18:0;0_20:2;0	Phosphatidylcholine (18:0_20:2)	SLM:000063942
PC 18:0;0_20:3;0	Phosphatidylcholine (18:0_20:3)	SLM:000063943
PC 18:0;0_20:4;0	Phosphatidylcholine (18:0_20:4)	SLM:000063944
PC 18:0;0_20:5;0	Phosphatidylcholine (18:0_20:5)	SLM:000063945
PC 18:0;0_22:5;0	Phosphatidylcholine (18:0_22:5)	SLM:000063952
PC 18:0;0_22:6;0	Phosphatidylcholine (18:0_22:6)	SLM:000063953
PC 18:1;0_18:1;0	Phosphatidylcholine (18:1_18:1)	SLM:000063984
PC 18:1;0_18:2;0	Phosphatidylcholine (18:1_18:2)	SLM:000063985
PC 18:1;0_20:2;0	Phosphatidylcholine (18:1_20:2)	SLM:000063991
PC 18:1;0_20:3;0	Phosphatidylcholine (18:1_20:3)	SLM:000063992
PC 18:1;0_20:4;0	Phosphatidylcholine (18:1_20:4)	SLM:000063993
PC 18:2;0_18:2;0	Phosphatidylcholine (18:2_18:2)	SLM:000064033
PC 18:2;0_20:3;0	Phosphatidylcholine (18:2_20:3)	SLM:000064040
PC 18:2;0_20:4;0	Phosphatidylcholine (18:2_20:4)	SLM:000064041
PC O-16:0;0/16:0;0	Phosphatidylcholine (O-16:0_16:0)	SLM:000065919
PC O-16:0;0/16:1;0	Phosphatidylcholine (O-16:0_16:1)	SLM:000065920
PC O-16:0;0/18:1;0	Phosphatidylcholine (O-16:0_18:1)	SLM:000065924
PC O-16:0;0/18:2;0	Phosphatidylcholine (O-16:0_18:2)	SLM:000065925
PC O-16:0;0/20:3;0	Phosphatidylcholine (O-16:0_20:3)	SLM:000065932
PC O-16:0;0/20:4;0	Phosphatidylcholine (O-16:0_20:4)	SLM:000065933
PC O-16:1;0/16:0;0	Phosphatidylcholine (O-16:1_16:0)	SLM:000065984
PC O-16:1;0/18:0;0	Phosphatidylcholine (O-16:1_18:0)	SLM:000065988
PC O-16:1;0/18:1;0	Phosphatidylcholine (O-16:1_18:1)	SLM:000065989
PC O-16:1;0/18:2;0	Phosphatidylcholine (O-16:1_18:2)	SLM:000065990
PC O-16:1;0/20:3;0	Phosphatidylcholine (O-16:1_20:3)	SLM:000065997
PC O-16:1;0/20:4;0	Phosphatidylcholine (O-16:1_20:4)	SLM:000065998
PC O-16:2;0/18:0;0	NA	NA
PC O-17:0;0/15:0;0	Phosphatidylcholine (O-17:0_15:0)	SLM:000066048
PC O-17:0;0/17:1;0	NA	NA
PC O-18:0;0/14:0;0	Phosphatidylcholine (O-18:0_14:0)	SLM:000066176
PC O-18:0;0/20:4;0	Phosphatidylcholine (O-18:0_20:4)	SLM:000066193
PC O-18:1;0/16:0;0	Phosphatidylcholine (O-18:1_16:0)	SLM:000066244
PC O-18:1;0/18:2;0	Phosphatidylcholine (O-18:1_18:2)	SLM:000066250
PC O-18:1;0/20:3;0	Phosphatidylcholine (O-18:1_20:3)	SLM:000066257
PC O-18:1;0/20:4;0	Phosphatidylcholine (O-18:1_20:4)	SLM:000066258
PC O-18:2;0/16:0;0	Phosphatidylcholine (O-18:2_16:0)	SLM:000066309
PC O-18:2;0/18:1;0	Phosphatidylcholine (O-18:2_18:1)	SLM:000066314
PC O-18:2;0/18:2;0	Phosphatidylcholine (O-18:2_18:2)	SLM:000066315
PC O-18:2;0/20:4;0	Phosphatidylcholine (O-18:2_20:4)	SLM:000066323
PE 16:0;0_20:4;0	Phosphatidylethanolamine (16:0_20:4)	SLM:000067702
PE 18:0;0_18:2;0	Phosphatidylethanolamine (18:0_18:2)	SLM:000067900
PE 18:0;0_20:4;0	Phosphatidylethanolamine (18:0_20:4)	SLM:000067908
PE 18:1;0_18:1;0	Phosphatidylethanolamine (18:1_18:1)	SLM:000067948
PE O-16:1;0/18:2;0	Phosphatidylethanolamine (O-16:1_18:2)	SLM:000069954
PE O-16:1;0/20:4;0	Phosphatidylethanolamine (O-16:1_20:4)	SLM:000069962
PE O-18:1;0/18:2;0	Phosphatidylethanolamine (O-18:1_18:2)	SLM:000070214
PE O-18:1;0/20:4;0	Phosphatidylethanolamine (O-18:1_20:4)	SLM:000070222
PE O-18:2;0/18:1;0	Phosphatidylethanolamine (O-18:2_18:1)	SLM:000070278
PE O-18:2;0/18:2;0	Phosphatidylethanolamine (O-18:2_18:2)	SLM:000070279
PE O-18:2;0/20:4;0	Phosphatidylethanolamine (O-18:2_20:4)	SLM:000070287
PI 16:0;0_18:1;0	Phosphatidylinositol (16:0_18:1)	SLM:000073801
PI 16:0;0_18:2;0	Phosphatidylinositol (16:0_18:2)	SLM:000073802
PI 16:0;0_20:4;0	Phosphatidylinositol (16:0_20:4)	SLM:000073810
PI 18:0;0_18:1;0	Phosphatidylinositol (18:0_18:1)	SLM:000074007
PI 18:0;0_18:2;0	Phosphatidylinositol (18:0_18:2)	SLM:000074008
PI 18:0;0_20:3;0	Phosphatidylinositol (18:0_20:3)	SLM:000074015
PI 18:0;0_20:4;0	Phosphatidylinositol (18:0_20:4)	SLM:000074016
PI 18:1;0_18:1;0	Phosphatidylinositol (18:1_18:1)	SLM:000074056
PI 18:1;0_18:2;0	Phosphatidylinositol (18:1_18:2)	SLM:000074057
PI 18:1;0_20:4;0	Phosphatidylinositol (18:1_20:4)	SLM:000074065
PI 18:2;0_18:2;0	Phosphatidylinositol (18:2_18:2)	SLM:000074105
SM 32:1;2	Sphingomyelin (d32:1)	SLM:000390695
SM 34:0;2	Sphingomyelin (d34:0)	SLM:000390716
SM 34:1;2	Sphingomyelin (d34:1)	SLM:000390714
SM 34:2;2	Sphingomyelin (d34:2)	SLM:000390712
SM 36:1;2	Sphingomyelin (d36:1)	SLM:000390739
SM 36:2;2	Sphingomyelin (d36:2)	SLM:000390737
SM 38:1;2	Sphingomyelin (d38:1)	SLM:000390767
SM 38:2;2	Sphingomyelin (d38:2)	SLM:000390765
SM 40:1;2	Sphingomyelin (d40:1)	SLM:000390797
SM 40:2;2	Sphingomyelin (d40:2)	SLM:000390795
SM 42:2;2	Sphingomyelin (d42:2)	SLM:000390823
TAG 46:1;0	Triacylglycerol (46:1)	SLM:000308244
TAG 46:2;0	Triacylglycerol (46:2)	SLM:000308245
TAG 48:0;0	Triacylglycerol (48:0)	SLM:000308257
TAG 48:1;0	Triacylglycerol (48:1)	SLM:000308258
TAG 48:2;0	Triacylglycerol (48:2)	SLM:000308259
TAG 48:3;0	Triacylglycerol (48:3)	SLM:000308260
TAG 49:1;0	Triacylglycerol (49:1)	SLM:000308267
TAG 49:2;0	Triacylglycerol (49:2)	SLM:000308268
TAG 50:1;0	Triacylglycerol (50:1)	SLM:000308276
TAG 50:2;0	Triacylglycerol (50:2)	SLM:000308277
TAG 50:3;0	Triacylglycerol (50:3)	SLM:000308278
TAG 50:4;0	Triacylglycerol (50:4)	SLM:000308279
TAG 50:5;0	Triacylglycerol (50:5)	SLM:000308280
TAG 51:1;0	Triacylglycerol (51:1)	SLM:000308286
TAG 51:2;0	Triacylglycerol (51:2)	SLM:000308287
TAG 51:3;0	Triacylglycerol (51:3)	SLM:000308288
TAG 51:4;0	Triacylglycerol (51:4)	SLM:000308289
TAG 52:2;0	Triacylglycerol (52:2)	SLM:000308298
TAG 52:3;0	Triacylglycerol (52:3)	SLM:000308299
TAG 52:4;0	Triacylglycerol (52:4)	SLM:000308300
TAG 52:5;0	Triacylglycerol (52:5)	SLM:000308301
TAG 52:6;0	Triacylglycerol (52:6)	SLM:000308302
TAG 53:2;0	Triacylglycerol (53:2)	SLM:000308309
TAG 53:3;0	Triacylglycerol (53:3)	SLM:000308310
TAG 53:4;0	Triacylglycerol (53:4)	SLM:000308311
TAG 54:3;0	Triacylglycerol (54:3)	SLM:000308323
TAG 54:4;0	Triacylglycerol (54:4)	SLM:000308324
TAG 54:5;0	Triacylglycerol (54:5)	SLM:000308325
TAG 54:6;0	Triacylglycerol (54:6)	SLM:000308326
TAG 54:7;0	Triacylglycerol (54:7)	SLM:000308327
TAG 56:3;0	Triacylglycerol (56:3)	SLM:000308349
TAG 56:4;0	Triacylglycerol (56:4)	SLM:000308350
TAG 56:5;0	Triacylglycerol (56:5)	SLM:000308351
TAG 56:6;0	Triacylglycerol (56:6)	SLM:000308352
TAG 56:7;0	Triacylglycerol (56:7)	SLM:000308353
TAG 56:8;0	Triacylglycerol (56:8)	SLM:000308354
TAG 58:7;0	Triacylglycerol (58:7)	SLM:000308381
TAG 58:8;0	Triacylglycerol (58:8)	SLM:000308382
NA, not available

## Sheet: Supp_Table2
Supplemental Table 2: Incidence of type 2 diabetes mellitus in relation to baseline levels of lipid species in the discovery and the replication set. Hazard ratios (HR) are expressed per 1-SD increment of lipid. The regressions are adjusted for age and sex.
	Discovery Cohort (n=257/1610)				Replication Cohort (n=249/1550)
Lipid	HR	Lower 95%CI	Upper 95%CI	P-value	HR	Lower 95%CI	Upper 95%CI	P-value
CE 14:0;0	1.0172	0.898616	1.15144	0.787378	1.00267	0.884928	1.13609	0.966576
CE 15:0;0	0.825261	0.728026	0.935483	0.00267636	0.835951	0.736218	0.949194	0.00570293
CE 16:0;0	0.941858	0.830151	1.0686	0.352393	0.973143	0.860137	1.10099	0.665541
CE 16:1;0	1.19345	1.05862	1.34546	0.00383638	1.13473	1.00017	1.28739	0.0496985
CE 17:0;0	0.814785	0.72209	0.919379	0.000887135	0.815692	0.723544	0.919576	0.000866011
CE 17:1;0	1.01578	0.897108	1.15015	0.804885	0.959499	0.847327	1.08652	0.514545
CE 18:0;0	0.927279	0.819757	1.0489	0.229873	1.0163	0.896766	1.15176	0.800098
CE 18:1;0	0.888322	0.784618	1.00573	0.0615265	0.915638	0.808862	1.03651	0.163579
CE 18:2;0	0.783485	0.689492	0.890291	0.000182421	0.828367	0.733376	0.935661	0.00244465
CE 18:3;0	1.04213	0.921889	1.17804	0.50946	1.00767	0.888169	1.14325	0.905541
CE 20:2;0	0.640467	0.572975	0.715909	4.43e-15	0.757615	0.707464	0.81132	1.96e-15
CE 20:3;0	1.1556	1.02128	1.30759	0.0217928	1.20662	1.0633	1.36926	0.00359953
CE 20:4;0	0.917671	0.811065	1.03829	0.172691	0.911077	0.805807	1.0301	0.137126
CE 20:5;0	0.979579	0.865638	1.10852	0.743652	1.00036	0.881834	1.13481	0.995562
CE 22:6;0	0.843203	0.743251	0.956596	0.00806681	0.939577	0.827792	1.06646	0.334854
Cer 40:1;2	0.948939	0.851616	1.05738	0.342459	1.14264	0.979931	1.33237	0.0888868
Cer 40:2;2	0.983962	0.868855	1.11432	0.798943	1.05591	0.928862	1.20034	0.405547
Cer 42:1;2	0.904312	0.819173	0.998299	0.0461834	1.09218	0.944467	1.26299	0.234318
Cer 42:2;2	1.0088	0.889904	1.14359	0.891037	1.11743	0.985022	1.26763	0.0844475
Chol	0.996073	0.878964	1.12878	0.950831	1.13972	1.01449	1.28042	0.0276492
DAG 16:0;0_18:1;0	1.42453	1.26852	1.59972	2.24318e-09	1.52613	1.34617	1.73015	4.01959e-11
DAG 16:0;0_18:2;0	1.36209	1.19984	1.54628	1.79285e-06	1.4686	1.28982	1.67216	6.52627e-09
DAG 16:1;0_18:1;0	1.34306	1.19146	1.51396	1.38874e-06	1.39929	1.23248	1.58868	2.13319e-07
DAG 18:1;0_18:1;0	1.30907	1.16762	1.46766	3.9106e-06	1.36742	1.20692	1.54926	8.99807e-07
DAG 18:1;0_18:2;0	1.22087	1.07748	1.38335	0.00174483	1.27088	1.12113	1.44064	0.000178686
DAG 18:1;0_18:3;0	0.764868	0.683684	0.855692	2.8387e-06	0.813901	0.728419	0.909415	0.00027566
LPC 14:0;0	1.22655	1.07866	1.39472	0.00183944	1.03274	0.913085	1.16809	0.608087
LPC 16:0;0	1.13309	0.99502	1.29032	0.0594763	0.868038	0.767991	0.981119	0.0235095
LPC 16:1;0	1.14741	1.01273	1.3	0.0308923	0.913857	0.805062	1.03736	0.163657
LPC 18:0;0	1.13307	0.99462	1.2908	0.0602665	0.957991	0.846059	1.08473	0.498411
LPC 18:1;0	0.849421	0.749917	0.962128	0.0102493	0.729931	0.647391	0.822995	2.72204e-07
LPC 18:2;0	0.701883	0.618159	0.796948	4.70583e-08	0.626663	0.55483	0.707796	5.328e-14
LPC 20:3;0	1.02648	0.904936	1.16436	0.684376	0.895506	0.786414	1.01973	0.0958798
LPC 20:4;0	0.92504	0.811453	1.05453	0.243747	0.768125	0.677577	0.870774	3.75298e-05
LPC 22:6;0	0.885411	0.782643	1.00167	0.0531879	0.834694	0.736379	0.946135	0.00471443
LPE 16:0;0	0.879116	0.775404	0.9967	0.0442656	0.76958	0.678349	0.873081	4.73845e-05
LPE 18:0;0	0.891645	0.790849	1.00529	0.0609602	0.797097	0.705058	0.90115	0.000291652
LPE 18:1;0	0.765514	0.691004	0.848059	3.14883e-07	0.701721	0.62664	0.785797	8.51472e-10
LPE 18:2;0	0.788092	0.699369	0.88807	9.3093e-05	0.735381	0.650696	0.831088	8.48197e-07
LPE 20:4;0	0.763522	0.676054	0.862306	1.38355e-05	0.685798	0.60601	0.776091	2.27633e-09
PC 14:0;0_18:1;0	0.899863	0.798995	1.01346	0.0819517	0.871977	0.763322	0.996099	0.043641
PC 14:0;0_18:2;0	0.987089	0.871288	1.11828	0.838276	1.01615	0.89263	1.15676	0.808569
PC 15:0;0_18:1;0	0.858193	0.757595	0.972149	0.0162169	0.89635	0.792115	1.0143	0.0827721
PC 15:0;0_18:2;0	0.765963	0.685621	0.855719	2.40585e-06	0.750209	0.661018	0.851433	8.56595e-06
PC 16:0;0_16:0;0	0.969554	0.854568	1.10001	0.631203	0.997409	0.879422	1.13123	0.967787
PC 16:0;0_16:1;0	1.06665	0.942292	1.20742	0.307655	1.16513	1.02068	1.33001	0.0236273
PC 16:0;0_17:1;0	0.870169	0.768132	0.985761	0.0288645	0.941358	0.828916	1.06905	0.351788
PC 16:0;0_18:0;0	1.06103	0.934889	1.20418	0.358969	1.00327	0.884263	1.13828	0.959643
PC 16:0;0_18:1;0	1.03159	0.911802	1.16711	0.621422	1.03728	0.914571	1.17645	0.568811
PC 16:0;0_18:2;0	0.962358	0.847692	1.09254	0.553356	0.904127	0.796391	1.02644	0.119498
PC 16:0;0_18:3;0	1.03805	0.918474	1.17319	0.549806	0.987596	0.866171	1.12604	0.852077
PC 16:0;0_20:1;0	0.981166	0.870131	1.10637	0.75633	0.98532	0.866986	1.1198	0.82077
PC 16:0;0_20:2;0	1.17741	1.03965	1.33343	0.0100986	1.12913	0.99515	1.28115	0.0594949
PC 16:0;0_20:3;0	1.39554	1.23342	1.57896	1.22537e-07	1.33686	1.17847	1.51654	6.41726e-06
PC 16:0;0_20:4;0	1.14216	1.01027	1.29128	0.0337442	1.01603	0.896794	1.15113	0.802798
PC 16:0;0_20:5;0	1.05346	0.934338	1.18777	0.394973	1.00739	0.886671	1.14455	0.909949
PC 16:0;0_22:4;0	1.09714	0.971137	1.23949	0.136377	0.950519	0.837993	1.07816	0.429885
PC 16:0;0_22:5;0	0.888205	0.785413	1.00445	0.0588612	0.910922	0.804315	1.03166	0.14179
PC 16:0;0_22:6;0	0.974616	0.859562	1.10507	0.688307	1.01548	0.893174	1.15454	0.814499
PC 16:1;0_18:0;0	1.16461	1.02419	1.32428	0.0200933	1.18521	1.03808	1.35319	0.0119849
PC 16:1;0_18:1;0	0.952377	0.838469	1.08176	0.452801	0.86161	0.75154	0.987801	0.0326811
PC 16:1;0_18:2;0	0.873428	0.769387	0.991538	0.0365027	0.819036	0.719313	0.932583	0.00258135
PC 17:0;0_18:2;0	0.903356	0.797148	1.02371	0.11123	0.828684	0.729177	0.94177	0.00398729
PC 17:0;0_20:3;0	1.24723	1.08403	1.435	0.00201765	1.23756	1.068	1.43404	0.00458279
PC 17:0;0_20:4;0	0.986432	0.873035	1.11456	0.826456	0.89314	0.784159	1.01727	0.0887338
PC 18:0;0_18:1;0	1.04281	0.918109	1.18446	0.518834	1.11134	0.982653	1.25687	0.0927114
PC 18:0;0_18:2;0	1.01349	0.890268	1.15377	0.839417	1.03331	0.911218	1.17176	0.609509
PC 18:0;0_18:3;0	1.14548	1.00922	1.30015	0.0355588	1.11406	0.977783	1.26933	0.104703
PC 18:0;0_20:2;0	0.968835	0.851598	1.10221	0.630426	1.04039	0.9171	1.18026	0.538376
PC 18:0;0_20:3;0	1.49784	1.32222	1.69678	2.15677e-10	1.54714	1.3632	1.75589	1.39991e-11
PC 18:0;0_20:4;0	1.16254	1.02706	1.31589	0.0172071	1.13498	1.00303	1.28428	0.0446439
PC 18:0;0_20:5;0	1.09774	0.968766	1.24389	0.143642	1.08372	0.955284	1.22942	0.211597
PC 18:0;0_22:5;0	1.11698	0.989462	1.26093	0.0736669	1.13194	0.999481	1.28195	0.0509636
PC 18:0;0_22:6;0	1.14565	1.00767	1.30252	0.0378367	1.25099	1.101	1.42142	0.000589158
PC 18:1;0_18:1;0	0.875796	0.770719	0.995198	0.0419734	0.808197	0.708401	0.922053	0.00154126
PC 18:1;0_18:2;0	0.865172	0.763347	0.980579	0.0233932	0.803831	0.705955	0.915278	0.000979572
PC 18:1;0_20:2;0	1.10814	0.978128	1.25543	0.106819	1.02379	0.897364	1.16802	0.726649
PC 18:1;0_20:3;0	1.16915	1.0294	1.32788	0.0161245	1.09155	0.958341	1.24327	0.187116
PC 18:1;0_20:4;0	0.928272	0.819747	1.05116	0.240655	0.846157	0.743138	0.963457	0.0116693
PC 18:2;0_18:2;0	0.760229	0.677323	0.853283	3.27049e-06	0.692017	0.614973	0.778712	9.76237e-10
PC 18:2;0_20:3;0	1.04832	0.923717	1.18973	0.464845	0.95538	0.846392	1.0784	0.46015
PC 18:2;0_20:4;0	0.984884	0.870012	1.11492	0.809771	0.845512	0.746765	0.957316	0.00808771
PC O-16:0;0/16:0;0	0.792224	0.707146	0.887538	5.86417e-05	0.748093	0.67729	0.826297	1.0582e-08
PC O-16:0;0/16:1;0	0.875249	0.787054	0.973326	0.0139372	0.910632	0.813208	1.01973	0.104893
PC O-16:0;0/18:1;0	0.730885	0.657814	0.812072	5.4316e-09	0.725135	0.645056	0.815154	7.32103e-08
PC O-16:0;0/18:2;0	0.682237	0.604627	0.76981	5.44256e-10	0.634576	0.556807	0.723208	9.2293e-12
PC O-16:0;0/20:3;0	0.861506	0.760595	0.975805	0.019012	0.911698	0.804774	1.03283	0.146367
PC O-16:0;0/20:4;0	1.00451	0.888647	1.13547	0.942679	0.925261	0.81738	1.04738	0.219415
PC O-16:1;0/16:0;0	0.764388	0.675596	0.86485	2.00217e-05	0.734033	0.648363	0.831023	1.04368e-06
PC O-16:1;0/18:0;0	0.746977	0.672643	0.829526	4.90557e-08	0.696341	0.627243	0.77305	1.13951e-11
PC O-16:1;0/18:1;0	0.72882	0.646656	0.821424	2.17973e-07	0.683635	0.603519	0.774386	2.22554e-09
PC O-16:1;0/18:2;0	0.736334	0.652335	0.831149	7.32199e-07	0.681502	0.603382	0.769735	6.69688e-10
PC O-16:1;0/20:3;0	1.09952	0.969322	1.24721	0.140098	1.00515	0.890327	1.13478	0.933838
PC O-16:1;0/20:4;0	0.891903	0.78631	1.01168	0.0751739	0.868319	0.768737	0.980801	0.0230936
PC O-16:2;0/18:0;0	0.808034	0.720927	0.905667	0.000249795	0.785962	0.700224	0.882198	4.37476e-05
PC O-17:0;0/15:0;0	0.872596	0.777375	0.97948	0.0207973	0.825022	0.728239	0.934669	0.0025178
PC O-17:0;0/17:1;0	0.95812	0.849603	1.0805	0.485437	0.944421	0.831048	1.07326	0.380822
PC O-18:0;0/14:0;0	0.905718	0.8055	1.0184	0.097893	0.820947	0.732001	0.920701	0.000746158
PC O-18:0;0/20:4;0	0.730073	0.647205	0.823552	3.08805e-07	0.743865	0.6571	0.842086	2.92378e-06
PC O-18:1;0/16:0;0	0.802498	0.70827	0.909261	0.000555182	0.772692	0.680986	0.876748	6.31989e-05
PC O-18:1;0/18:2;0	0.725479	0.64714	0.813302	3.70223e-08	0.731481	0.644427	0.830295	1.32057e-06
PC O-18:1;0/20:3;0	0.9185	0.815289	1.03478	0.162155	1.03511	0.909592	1.17796	0.600803
PC O-18:1;0/20:4;0	0.8854	0.783253	1.00087	0.051645	0.821411	0.723155	0.933017	0.00247334
PC O-18:2;0/16:0;0	0.656627	0.586507	0.735131	2.8711e-13	0.604097	0.53248	0.685345	4.94e-15
PC O-18:2;0/18:1;0	0.667962	0.59514	0.749695	7.31101e-12	0.637133	0.562199	0.722056	1.65253e-12
PC O-18:2;0/18:2;0	0.818829	0.727138	0.922082	0.000971087	0.75907	0.668369	0.86208	2.17868e-05
PC O-18:2;0/20:4;0	1.05958	0.936962	1.19824	0.356379	0.893607	0.789457	1.0115	0.0752174
PE 16:0;0_20:4;0	0.966767	0.85116	1.09808	0.602976	0.964486	0.854033	1.08922	0.560082
PE 18:0;0_18:2;0	1.15642	1.01762	1.31416	0.0259051	1.13087	0.99658	1.28326	0.0565403
PE 18:0;0_20:4;0	1.09053	0.962704	1.23532	0.173066	1.03661	0.914218	1.17539	0.574849
PE 18:1;0_18:1;0	1.002	0.888412	1.13011	0.974059	0.949738	0.83486	1.08042	0.433052
PE O-16:1;0/18:2;0	0.881187	0.787805	0.985639	0.026894	0.944131	0.827912	1.07666	0.390999
PE O-16:1;0/20:4;0	0.983081	0.870015	1.11084	0.78429	0.95448	0.841863	1.08216	0.467041
PE O-18:1;0/18:2;0	0.76826	0.6894	0.85614	1.83556e-06	0.809908	0.727677	0.901431	0.000113544
PE O-18:1;0/20:4;0	0.861712	0.764092	0.971802	0.0152565	0.829908	0.731856	0.941097	0.00365694
PE O-18:2;0/18:1;0	0.865036	0.770994	0.970548	0.0135466	0.815352	0.716944	0.927267	0.00186668
PE O-18:2;0/18:2;0	0.796493	0.707705	0.896421	0.000161149	0.776354	0.684812	0.880132	7.66584e-05
PE O-18:2;0/20:4;0	0.87155	0.770966	0.985257	0.027995	0.856674	0.756962	0.96952	0.0142761
PI 16:0;0_18:1;0	0.923831	0.815513	1.04654	0.213088	0.959718	0.846105	1.08859	0.52244
PI 16:0;0_18:2;0	1.24328	1.09221	1.41524	0.000986211	1.11803	0.983449	1.27104	0.0882081
PI 16:0;0_20:4;0	1.11282	0.987202	1.25443	0.0802555	1.05776	0.933178	1.19897	0.379809
PI 18:0;0_18:1;0	1.00419	0.88561	1.13866	0.947953	0.931924	0.821939	1.05663	0.271191
PI 18:0;0_18:2;0	1.17496	1.03554	1.33314	0.0123544	1.0116	0.888266	1.15206	0.861993
PI 18:0;0_20:3;0	1.17152	1.0314	1.33068	0.0148681	1.10679	0.975611	1.2556	0.114944
PI 18:0;0_20:4;0	1.21346	1.07282	1.37255	0.00208211	1.09904	0.96954	1.24584	0.139841
PI 18:1;0_18:1;0	0.938389	0.830747	1.05998	0.306331	0.827911	0.729755	0.939268	0.0033565
PI 18:1;0_18:2;0	0.888564	0.798462	0.988833	0.0303245	0.823568	0.722275	0.939066	0.00374518
PI 18:1;0_20:4;0	0.912519	0.805728	1.03346	0.149406	0.838854	0.734773	0.957676	0.00932829
PI 18:2;0_18:2;0	0.880783	0.780257	0.99426	0.0400662	0.954372	0.843161	1.08025	0.460022
SM 32:1;2	1.096	0.964406	1.24554	0.160141	1.0469	0.91701	1.19519	0.497677
SM 34:0;2	1.13046	0.997702	1.28089	0.05437	1.17155	1.0355	1.32548	0.0119446
SM 34:1;2	1.01986	0.897348	1.1591	0.763288	1.00333	0.882106	1.14121	0.959671
SM 34:2;2	1.13557	0.99386	1.29749	0.0615673	1.03084	0.896536	1.18527	0.669734
SM 36:1;2	1.21854	1.07469	1.38164	0.00204356	1.32949	1.1655	1.51656	2.23478e-05
SM 36:2;2	1.10207	0.963552	1.26051	0.156135	1.16761	1.01634	1.34139	0.0285995
SM 38:1;2	1.22189	1.07842	1.38446	0.00166313	1.19114	1.04564	1.35688	0.00850448
SM 38:2;2	1.07412	0.939294	1.22831	0.296094	1.01773	0.886084	1.16893	0.803638
SM 40:1;2	1.27418	1.12687	1.44074	0.000110832	1.2897	1.13618	1.46395	8.33859e-05
SM 40:2;2	1.14038	1.00242	1.29733	0.0458577	1.06866	0.934164	1.22251	0.333249
SM 42:2;2	1.1374	1.00642	1.28542	0.0391552	1.18321	1.04298	1.3423	0.00895535
TAG 46:1;0	1.41651	1.24354	1.61354	1.60427e-07	1.35109	1.1896	1.53451	3.60113e-06
TAG 46:2;0	1.31682	1.16075	1.49387	1.90319e-05	1.31996	1.16763	1.49217	9.12116e-06
TAG 48:0;0	1.60534	1.41733	1.81829	9.478e-14	1.6327	1.44278	1.84762	7.86e-15
TAG 48:1;0	1.50857	1.33461	1.70521	4.79283e-11	1.52102	1.34746	1.71693	1.1666e-11
TAG 48:2;0	1.36323	1.20549	1.5416	7.86132e-07	1.40448	1.24208	1.58811	6.03209e-08
TAG 48:3;0	1.29579	1.14175	1.47061	5.99591e-05	1.31093	1.15572	1.48697	2.54136e-05
TAG 49:1;0	1.3775	1.21084	1.56709	1.12844e-06	1.44103	1.26618	1.64003	3.09487e-08
TAG 49:2;0	1.34029	1.18252	1.51911	4.57047e-06	1.35716	1.19807	1.53736	1.57977e-06
TAG 50:1;0	1.56492	1.38717	1.76546	3.3437e-13	1.64757	1.46127	1.85762	3.5e-16
TAG 50:2;0	1.44526	1.28266	1.62847	1.46633e-09	1.51045	1.33749	1.70578	3.00401e-11
TAG 50:3;0	1.34078	1.18721	1.51422	2.30299e-06	1.4068	1.24222	1.59318	7.57704e-08
TAG 50:4;0	1.27706	1.12893	1.44464	0.000101194	1.32474	1.16724	1.50348	1.33286e-05
TAG 50:5;0	1.23327	1.09102	1.39407	0.000799072	1.25988	1.11126	1.42837	0.000309529
TAG 51:1;0	1.43394	1.2638	1.62699	2.23207e-08	1.49231	1.31404	1.69475	6.92833e-10
TAG 51:2;0	1.36145	1.20583	1.53715	6.28305e-07	1.40831	1.24498	1.59307	5.21075e-08
TAG 51:3;0	1.27524	1.1272	1.44271	0.000112554	1.30099	1.14793	1.47446	3.78323e-05
TAG 51:4;0	1.17931	1.04268	1.33384	0.00865807	1.1967	1.05547	1.35682	0.00506861
TAG 52:2;0	1.3794	1.22413	1.55437	1.29754e-07	1.47433	1.30339	1.66769	6.65501e-10
TAG 52:3;0	1.30073	1.14963	1.47169	3.0042e-05	1.39261	1.22832	1.57888	2.33141e-07
TAG 52:4;0	1.24478	1.09937	1.40942	0.000550934	1.32044	1.16319	1.49895	1.73545e-05
TAG 52:5;0	1.26914	1.12154	1.43617	0.00015793	1.32116	1.1641	1.4994	1.60963e-05
TAG 52:6;0	1.25361	1.10861	1.41757	0.000313224	1.31462	1.15729	1.49335	2.59866e-05
TAG 53:2;0	1.30203	1.15408	1.46894	1.7986e-05	1.342	1.18545	1.51922	3.34974e-06
TAG 53:3;0	1.22977	1.08803	1.38997	0.000931853	1.24265	1.09707	1.40755	0.000632855
TAG 53:4;0	1.19535	1.05514	1.3542	0.00506138	1.20547	1.06178	1.36862	0.00390722
TAG 54:3;0	1.27054	1.12703	1.43234	9.02728e-05	1.29386	1.14299	1.46464	4.6454e-05
TAG 54:4;0	1.19684	1.05896	1.35268	0.00401175	1.20077	1.05944	1.36095	0.00418821
TAG 54:5;0	1.23332	1.09236	1.39247	0.000707752	1.22424	1.08088	1.38663	0.0014533
TAG 54:6;0	1.29971	1.15094	1.4677	2.37149e-05	1.33113	1.1748	1.50826	7.20709e-06
TAG 54:7;0	1.27326	1.12896	1.43601	8.27468e-05	1.30722	1.15161	1.48385	3.43006e-05
TAG 56:3;0	1.35557	1.20433	1.52581	4.65067e-07	1.2994	1.13905	1.48233	9.72558e-05
TAG 56:4;0	1.33242	1.18567	1.49735	1.43275e-06	1.20514	1.06155	1.36815	0.00394218
TAG 56:5;0	1.33948	1.19209	1.50511	8.92457e-07	1.29413	1.14394	1.46405	4.1951e-05
TAG 56:6;0	1.26285	1.12061	1.42315	0.000129428	1.27729	1.1296	1.44428	9.46683e-05
TAG 56:7;0	1.25869	1.11665	1.4188	0.000165961	1.34862	1.18742	1.53169	4.12506e-06
TAG 56:8;0	1.21121	1.0731	1.3671	0.00192086	1.31364	1.15617	1.49255	2.82095e-05
TAG 58:7;0	1.26242	1.12243	1.41988	0.000101936	1.27404	1.12348	1.44478	0.000160281
TAG 58:8;0	1.22381	1.08736	1.37738	0.000812244	1.19528	1.05265	1.35724	0.00593562
Abbreviations: CE, cholesteryl ester; DAG, diacylglyceride; LPC, lysophosphatidylcholine; LPE, lysophosphatidylethanolamine; PC, phosphatidylcholine; PC O, PC plasmalogen; PE O, phosphatidylethanolamine plasmalogen; SM, sphingomyeline; TAG, triacylglyceride.

## Sheet: Supp_Table3
Supplemental Table 3: Lipid loadings from the OPLS-DA in the discovery set (n=1868).
Lipid	Loading	SE
CE 20:2;0	-0.091068	0.0514531
DAG 18:1;0_18:3;0	-0.065531	0.0612718
LPC 18:2;0	-0.0771647	0.0574586
LPE 16:0;0	-0.0415253	0.0385189
LPE 18:1;0	-0.0807475	0.0470395
LPE 18:2;0	-0.0730928	0.0420099
LPE 20:4;0	-0.0672104	0.0341124
PC 15:0;0_18:2;0	-0.0747454	0.0671975
PC 16:0;0_17:1;0	-0.03325	0.0323827
PC 18:1;0_18:1;0	-0.0439501	0.0291766
PC 18:1;0_18:2;0	-0.0414981	0.0357115
PC 18:2;0_18:2;0	-0.0628452	0.0514294
PC O-16:0;0/16:0;0	-0.0637374	0.0586932
PC O-16:0;0/18:1;0	-0.0786437	0.0193938
PC O-16:0;0/18:2;0	-0.081153	0.0270166
PC O-16:1;0/16:0;0	-0.0757816	0.0481451
PC O-16:1;0/18:0;0	-0.0949158	0.0448232
PC O-16:1;0/18:1;0	-0.0637825	0.0298316
PC O-16:1;0/18:2;0	-0.0663355	0.0221341
PC O-16:2;0/18:0;0	-0.0536344	0.0310333
PC O-18:0;0/14:0;0	-0.0463837	0.0351709
PC O-18:0;0/20:4;0	-0.0486988	0.0193222
PC O-18:1;0/16:0;0	-0.0603443	0.0166038
PC O-18:1;0/18:2;0	-0.0672282	0.0234488
PC O-18:1;0/20:4;0	-0.0324903	0.0285533
PC O-18:2;0/16:0;0	-0.100157	0.0339989
PC O-18:2;0/18:1;0	-0.0962235	0.0337078
PC O-18:2;0/18:2;0	-0.0617777	0.0325255
PE O-16:1;0/18:2;0	-0.0497391	0.0361068
PE O-18:1;0/18:2;0	-0.0664055	0.0360114
PE O-18:1;0/20:4;0	-0.032891	0.0326077
PE O-18:2;0/18:1;0	-0.0490367	0.0221806
PE O-18:2;0/18:2;0	-0.0615814	0.0357137
PE O-18:2;0/20:4;0	-0.0394728	0.0345191
PI 18:1;0_18:1;0	-0.0396072	0.0350716
CE 20:3;0	0.0439258	0.029882
DAG 16:0;0_18:1;0	0.0782008	0.0244604
DAG 16:0;0_18:2;0	0.0593727	0.0525758
DAG 16:1;0_18:1;0	0.0647044	0.0127728
DAG 18:1;0_18:1;0	0.0608896	0.0293934
PC 16:0;0_20:2;0	0.036809	0.0199974
PC 16:0;0_20:3;0	0.0718335	0.026318
PC 16:0;0_20:4;0	0.0340297	0.0256616
PC 16:0;0_22:4;0	0.0300016	0.0299808
PC 17:0;0_20:3;0	0.0307388	0.0272287
PC 18:0;0_20:3;0	0.0818325	0.0192738
PC 18:0;0_20:4;0	0.0381992	0.0266635
PC 18:0;0_22:5;0	0.0380385	0.0199644
PC 18:1;0_20:2;0	0.0182076	0.0174773
PC 18:1;0_20:3;0	0.0336642	0.0240849
PC O-16:1;0/20:3;0	0.0264788	0.0262525
PI 16:0;0_18:2;0	0.0319486	0.0299066
PI 18:0;0_20:4;0	0.0341056	0.0256204
SM 38:1;2	0.0513828	0.0462762
SM 40:1;2	0.0562254	0.0242385
TAG 46:1;0	0.0609173	0.0442217
TAG 46:2;0	0.04933	0.0426429
TAG 48:0;0	0.0810366	0.0308997
TAG 48:1;0	0.0743063	0.0447505
TAG 48:2;0	0.0637827	0.0389587
TAG 48:3;0	0.0494178	0.0347042
TAG 49:1;0	0.0653169	0.0524951
TAG 49:2;0	0.0608495	0.0447384
TAG 50:1;0	0.0798097	0.0325874
TAG 50:2;0	0.073959	0.0279371
TAG 50:3;0	0.0614546	0.0275762
TAG 50:4;0	0.0495575	0.0360734
TAG 50:5;0	0.0410202	0.0408892
TAG 51:1;0	0.070983	0.0444108
TAG 51:2;0	0.0650487	0.0371273
TAG 51:3;0	0.0520186	0.0365454
TAG 52:2;0	0.0654621	0.0266613
TAG 52:3;0	0.0532856	0.0514313
TAG 53:2;0	0.0572032	0.0329112
TAG 53:3;0	0.0450703	0.0443728
TAG 56:5;0	0.063394	0.0415112
TAG 56:6;0	0.0583061	0.0489279
Abbreviations: CE, cholesteryl ester; DAG, diacylglyceride; LPC, lysophosphatidylcholine; LPE, lysophosphatidylethanolamine; PC, phosphatidylcholine; PC O, PC plasmalogen; PE O, phosphatidylethanolamine plasmalogen; SM, sphingomyeline; TAG, triacylglyceride.

## Sheet: Supp_Table4
Supplemental Table 4: Incidence of type 2 diabetes mellitus in relation to baseline levels of the lipid predictive component in the discovery and replication set adjusting for traditional risk factors and a diet risk score for T2DM incidence (DRSDM), leisure time physical activity level, family history of diabetes and use of lipid lowering therapy.
	Discovery Set	Replication Set
	(n=223/1448)	(n=214/1410)
Overall
HRa (95%CI)	1.76 (1.58-1.96)	1.57 (1.40-1.77)
P-value	<0.001	<0.001
Quintiles
HRb Q1	1.0 (referent)	1.0 (referent)
HRb Q2	1.20 (0.61-2.39)	1.19 (0.64-2.22)
HRb Q3	2.14 (1.15-4.00)	1.10 (0.60-2.00)
HRb Q4	2.70 (1.46-4.98)	1.69 (0.96-3.00)
HRb Q5	5.40 (2.97-9.83)	3.09 (1.76-5.43)
Pc for trend	<0.001	<0.001
aHazard Ratios (HR) are expressed per 1-SD increment of the lipid predictive component. 95% confidence intervals of the HRs are reported in parenthesis.
bHazard Ratios (HR) are expressed per quintile of the lipid predictive component, using quintile 1 as reference. 95% confidence intervals of the HRs are reported in parenthesis.
cP for trend across quintiles of the lipid predictive component in a linear regression model.

## Sheet: Supp_Table5
Supplemental Table 5: Incidence of type 2 diabetes mellitus in relation to baseline levels of the lipid predictive component in the replication set adjusting for traditional risk factor including BMI categories and a diet risk score for T2DM incidence (DRSDM), leisure time physical activity level, family history of diabetes and use of lipid lowering therapy.
	Replication set (n=214/1410)
	HR (95% CI)
BMI (kg/m2) categoriesa
≤ 25	1.0 (referent)
25-30·	1.08 (0.78-1.51)
> 30	1.87 (1.25-2.81)
Quintiles of lipid predictive component
Q1	1.0 (referent)
Q2	1.20 (0.65-2.24)
Q3	1.14 (0.63-2.08)
Q4	1.82 (1.02-3.24)
Q5	3.32 (1.89-5.84)
aNumber of individuals per BMI category is repectively: 833, 632 and 159.
CI: confidence interval; HR: hazards ratio.

## Sheet: Supp_Table6
Supplemental Table 6: Incidence of type 2 diabetes mellitus in relation to baseline levels of the lipid predictive component in sensitivity analyses in the replication set.
	Males		Females		Fasting plasma glucose concentration < 5.6 mM
	Model 1	Model 2	Model 1	Model 2	Model 1	Model 2
	(n=102/587)	(n=99/576)	(n=147/963)	(n=144/941)	(n=69/950)	(n=65/929)
Overall
HRa (95%CI)	1.61 (1.39-1.86)	1.52 (1.26-1.84)	2.14 (1.90-2.41)	1.70 (1.46-1.97)	1.98 (1.66-2.37)	2.01 (1.63-2.47)
P-value	<0.001	<0.001	<0.001	<0.001	<0.001	<0.001
Model 1 is adjusted for: age and sex.
Model 2 is adjusted for: age, sex, BMI, SBP, use of antihypertensive treatment, current smoking and fasting plasma levels of glucose, triglycerides, LDL-C and HDL-C at baseline.
aHazard Ratios (HR) are expressed per 1-SD increment of the lipid predictive component. 95% confidence intervals of the HRs are reported in parenthesis.

## Sheet: Supp_Table7
Supplemental Table 7: Mean of the lipid predictive component across tertiles of food patterns and lifestyle scores in the whole cohort.
Lifestyle	Betaa	Std.Error	Tertile 1		Tertile 2		Tertile 3		P-trend
			Mean	Std.Error	Mean	Std.Error	Mean	Std.Error
Diet risk score for T2DM
Model 1b	0.118	0.027	-0.096	0.035	-0.001	0.022	0.147	0.041	<0.001
Model 2c	0.098	0.025	-0.084	0.033	-0.009	0.020	0.119	0.039	<0.001
Model 3d	0.087	0.026	-0.087	0.034	-0.017	0.021	0.091	0.041	<0.001
Leisure time physical activity score
Model 1b	-0.087	0.021	0.093	0.030	-0.020	0.030	-0.081	0.030	<0.001
Model 2c	-0.075	0.020	0.071	0.028	-0.018	0.028	-0.080	0.028	<0.001
Model 4e	-0.069	0.020	0.058	0.029	-0.023	0.028	-0.081	0.028	<0.001
Processed meat
Model 1b	0.079	0.021	-0.086	0.030	0.017	0.029	0.071	0.029	<0.001
Model 2c	0.056	0.019	-0.078	0.028	0.030	0.027	0.033	0.027	<0.01
Model 3d	0.050	0.020	-0.082	0.029	0.017	0.028	0.017	0.028	<0.05
Whole grain
Model 1b	-0.018	0.021	-0.001	0.029	0.046	0.029	-0.036	0.029	ns
Model 2c	-0.012	0.019	-0.005	0.027	0.023	0.028	-0.029	0.027	ns
Model 3d	0.001	0.020	-0.032	0.029	0.018	0.029	-0.030	0.028	ns
Coffee
Model 1b	-0.044	0.021	0.040	0.029	0.011	0.029	-0.047	0.030	<0.05
Model 2c	-0.062	0.020	0.051	0.027	0.006	0.027	-0.072	0.028	<0.01
Model 3d	-0.073	0.021	0.050	0.028	-0.003	0.028	-0.098	0.029	<0.001
Sugar sweetened beverages
Model 1b	0.068	0.020	-0.083	0.029	0.042	0.030	0.054	0.029	<0.001
Model 2c	0.043	0.019	-0.059	0.027	0.024	0.028	0.028	0.027	<0.05
Model 3d	0.040	0.020	-0.069	0.028	0.013	0.029	0.013	0.028	<0.05
Fish & shelfish
Model 1b	-0.016	0.021	0.027	0.029	-0.015	0.029	-0.006	0.030	ns
Model 2c	-0.023	0.019	0.026	0.027	-0.018	0.027	-0.021	0.028	ns
Model 3d	-0.036	0.020	0.032	0.028	-0.040	0.028	-0.041	0.029	ns
Fruits & vegetables
Model 1b	-0.019	0.022	0.021	0.029	0.001	0.029	-0.018	0.031	ns
Model 2c	-0.060	0.021	0.053	0.027	-0.009	0.027	-0.067	0.029	ns
Model 3d	-0.031	0.022	0.013	0.029	-0.015	0.028	-0.048	0.030	ns
Dairy food
Model 1b	0.054	0.021	-0.049	0.029	0.004	0.029	0.058	0.030	<0.01
Model 2c	0.049	0.020	-0.048	0.027	-0.009	0.027	0.051	0.028	<0.05
Model 3d	0.056	0.020	-0.063	0.028	-0.026	0.028	0.048	0.029	<0.01
aBeta indicates mean difference per score tertile or per intake tertile of energy adjusted food group
bModel 1: adjusted for age and sex (n=3570)
cModel 2: adjusted for age, sex and BMI (n=3570)
dModel 3: adjusted for age, sex, BMI, smoking, alcohool intake and leisure time physical activity level (n=3294)
eModel 4: adjusted for age, sex, BMI, smoking and alcohool intake (n=3294)
